# Supplementary material for: Microstructural MRI Correlates of Cognitive Impairment in Multiple Sclerosis: The Role of Deep Gray Matter
Source: MDPI journal article supplement (doi:10.3390/diagnostics11061103), 2021-06-16
Supplement: s1 [file s1]

## Supplemental Material

**Table S1.** Results of ANCOVA analyses comparing the neuropsychological performance of apparently cognitively normal (ACN) and cognitive impaired (CI) patients. Values are reported as mean  $\pm$  standard deviation across each group.

| Test            | CI               | ACN              | Sig.    |
|-----------------|------------------|------------------|---------|
| <b>SRT_LTS</b>  | 29.92 $\pm$ 2.70 | 50.98 $\pm$ 4.19 | <0.001* |
| <b>SRT_CLRT</b> | 20.19 $\pm$ 2.68 | 43.56 $\pm$ 4.19 | <0.001* |
| <b>SRT_D</b>    | 5.64 $\pm$ 0.49  | 9.27 $\pm$ 0.76  | 0.001*  |
| <b>SPART_I</b>  | 19.18 $\pm$ 0.87 | 23.95 $\pm$ 1.35 | 0.007*  |
| <b>SPART_D</b>  | 6.67 $\pm$ 0.39  | 8.75 $\pm$ 0.61  | 0.009*  |
| <b>SDMT</b>     | 43.52 $\pm$ 2.16 | 56.71 $\pm$ 3.35 | 0.003*  |
| <b>PASAT3</b>   | 36.65 $\pm$ 1.99 | 47.69 $\pm$ 3.09 | 0.007*  |
| <b>PASAT2</b>   | 29.14 $\pm$ 1.98 | 36.65 $\pm$ 3.08 | 0.055   |
| <b>WLG</b>      | 22.94 $\pm$ 0.99 | 29.04 $\pm$ 1.54 | 0.003*  |
| <b>ST_EIT</b>   | 21.97 $\pm$ 4.72 | 11.38 $\pm$ 7.33 | 0.248   |
| <b>ST_EIE</b>   | 1.13 $\pm$ 0.33  | 0.02 $\pm$ 0.52  | 0.091   |

*SRT\_LTS = selective reminding test-long-term storage; SRT\_CLRT = selective reminding test-consistent long-term retrieval; SRT\_D = selective reminding test-delayed; SPART\_I = spatial recall test-immediate; SPART\_D = spatial recall test-delayed; SDMT = symbol digit modalities test; PASAT = paced auditory serial addition test; WLG = world list generation; ST\_EIT = stroop test-effect interference time; ST\_EIE = stroop test-effect interference error; \* = statistical significance at  $p < 0.05$*
